# Supplementary material for: Identification of molecular genetic contributants to canine cutaneous mast cell tumour metastasis by global gene expression analysis
Source: PubMed Central journal article supplement (PMC6300220; doi:10.1371/journal.pone.0208026), 2018-12-19
Supplement: pone.0208026.s003.pdf [file pone.0208026.s003.pdf]

**S1 Table. Reagents used in quantitative PCR assays.**

**A. RNA integrity assay.**

| Gene ID.  | Forward primer sequence (5'-3') | Reverse primer sequence (5'-3') | PCR product size (bp) |
|-----------|---------------------------------|---------------------------------|-----------------------|
| CfSINE126 | GATCCCTGGGTGGCGCA               | GAGACACAGGCAGAGGGAGA            | 126                   |

**B. Assay for reverse transcription and/or PCR inhibitors.**

| ID.                 | Sequence (5'-3')                                                                                      |
|---------------------|-------------------------------------------------------------------------------------------------------|
| SPUD Amplicon       | AACTTGGCTTTAATGGACCTCCAATTTTGAGTGTGCACAAGCTATGGAACACCACGTAAGACATAAAACGGCCACATATGGTGCCATGTAAGGATGAATGT |
| SPUD Forward Primer | AACTTGGCTTTAATGGACCTCCA                                                                               |
| SPUD Reverse Primer | ACATTCATCCTTACATGGCACCA                                                                               |

**C. RT-qPCR assays for quantitation of gene expression** (optimal probe and primer concentrations, established experimentally, are listed)

*TaqMan* assays

| Gene ID. | Probe                       |            | Forward Primer       |            | Reverse Primer         |            | PCR product size (bp) | Reaction efficiency (%) |
|----------|-----------------------------|------------|----------------------|------------|------------------------|------------|-----------------------|-------------------------|
|          | Sequence (5'-3')            | Conc. (nM) | Sequence (5'-3')     | Conc. (nM) | Sequence (5'-3')       | Conc. (nM) |                       |                         |
| KRT10    | TTGAACAAATGTCCAGCCACAAATCTG | 250        | CTGACTACAGAAATCAACAG | 900        | GCGTCTCAATTCAGTAATC    | 300        | 72                    | 71.51                   |
| SBSN     | ACCGAGGGCTGACCAATGCA        | 150        | GAAGGTCATTGAAGGAATC  | 900        | GAGTGATTCCATTATTGATGC  | 900        | 89                    | 84.63                   |
| EGR1     | CCACCTCCTATCCGTACCTGTA      | 50         | CTACCTCTTATCCCTCCC   | 300        | ATGGGTAGGTTGAGGAA      | 300        | 87                    | 81.16                   |
| DSP      | AGCAGATCCACTCCAGACTTCA      | 150        | CCATGAAGACGGAAGT     | 300        | TCCAGGTCATAGAGAGG      | 900        | 76                    | 119.73                  |
| PERP     | TCTTTCTTTGCCCTCTGCGGAC      | 150        | TGGTGATCTGCTTCATC    | 300        | CCTCCAATCACTCTCAG      | 900        | 76                    | 82.84                   |
| CD9      | CAAGACACCCAGCCTTCTAGCTTC    | 50         | GACCAAGAGCATCTTTGA   | 900        | CTCCAATCAGAATATAAACTCC | 900        | 71                    | 105.91                  |

SYBR Green assays

| Gene ID.           | Forward Primer          |            | Reverse Primer        |            | PCR product size (bp) | Reaction efficiency (%) |
|--------------------|-------------------------|------------|-----------------------|------------|-----------------------|-------------------------|
|                    | Sequence (5'-3')        | Conc. (nM) | Sequence (5'-3')      | Conc. (nM) |                       |                         |
| SNORD93            | GCCGAGGATGAGAAATCTAATCT | 300        | AACGCCATCAGAGAAGCATAT | 300        | 50                    | 99.64                   |
| ENSCAFG00000030560 | TTCCCTGCTGGAGACAA       | 800        | GGATGATCTGGATCCTTCTG  | 800        | 53                    | 102.26                  |
| KRTAP4-4           | TTGTGGCTCCGTCTGCTCTG    | 500        | CGGCAGCAGGTCTCCTCG    | 800        | 51                    | 100.29                  |
| CfSINE71*          | GGAGACCCGGGATCGAAT      | 300        | GAGACACAGGCAGAGGGAG   | 300        | 71                    | 124.22                  |

\*Reference gene for calculation of relative gene expression levels
