# Supplementary material for: Identification of molecular genetic contributants to canine cutaneous mast cell tumour metastasis by global gene expression analysis
Source: PubMed Central journal article supplement (PMC6300220; doi:10.1371/journal.pone.0208026), 2018-12-19
Supplement: pone.0208026.s004.pdf [file pone.0208026.s004.pdf]

**S2 Table. Assay for reverse transcription and PCR inhibitors in MCT RNAs.**

SPUD amplicon alone Cq = 25.36 ± 0.003

**A. Metastasising MCTs.**

| Dog ID. | Mean Cq | Cq SD | Cq - SPUD Amplicon Cq |
|---------|---------|-------|-----------------------|
| B1      | 25.71   | 0.02  | 0.35                  |
| CB1     | 25.69   | 0.01  | 0.33                  |
| CB4     | 25.84   | 0.12  | 0.48                  |
| CB6     | 25.76   | 0.03  | 0.40                  |
| CCR1    | 25.75   | 0.05  | 0.39                  |
| D1      | 25.77   | 0.00  | 0.41                  |
| GR1     | 25.81   | 0.01  | 0.45                  |
| GS1     | 25.68   | 0.04  | 0.32                  |
| HV1     | 25.75   | 0.03  | 0.39                  |
| LR1     | 25.71   | 0.04  | 0.35                  |
| LR10    | 25.69   | 0.06  | 0.33                  |
| LR2     | 25.75   | 0.00  | 0.39                  |
| LR3     | 25.74   | 0.06  | 0.38                  |
| LR5     | 25.75   | 0.04  | 0.39                  |
| LR8     | 25.67   | 0.02  | 0.31                  |
| LR9     | 25.83   | 0.05  | 0.47                  |
| SBT1    | 25.75   | 0.02  | 0.39                  |
| W1      | 25.68   | 0.07  | 0.32                  |

|                             |              |
|-----------------------------|--------------|
| Mean and standard deviation | 25.74 ± 0.05 |
| Median                      | 25.75        |
| Interquartile range         | 0.06         |

|             |
|-------------|
| 0.38 ± 0.05 |
| 0.39        |

**B. Non-metastasising MCTs.**

| Dog ID. | Mean Cq | Cq SD | Cq - SPUD Amplicon Cq |
|---------|---------|-------|-----------------------|
| B2      | 25.88   | 0.06  | 0.52                  |
| B3      | 25.76   | 0.04  | 0.40                  |
| B4      | 25.68   | 0.03  | 0.32                  |
| CB2     | 25.80   | 0.04  | 0.44                  |
| CB3     | 25.87   | 0.04  | 0.51                  |
| CB5     | 25.70   | 0.02  | 0.34                  |
| ETT1    | 25.80   | 0.06  | 0.44                  |
| GR2     | 25.74   | 0.00  | 0.38                  |
| GR3     | 25.83   | 0.11  | 0.47                  |
| GR4     | 25.55   | 0.00  | 0.19                  |
| LR4     | 25.79   | 0.11  | 0.43                  |
| LR6     | 25.04   | 0.89  | -0.32                 |
| LR7     | 25.80   | 0.09  | 0.44                  |
| MS1     | 25.77   | 0.03  | 0.41                  |
| SBT2    | 25.81   | 0.05  | 0.45                  |
| W2      | 25.74   | 0.07  | 0.38                  |

|                             |              |
|-----------------------------|--------------|
| Mean and standard deviation | 25.72 ± 0.19 |
| Median                      | 25.78        |
| Interquartile range         | 0.07         |

|             |
|-------------|
| 0.36 ± 0.19 |
| 0.42        |
