# Supplementary material for: Identification of molecular genetic contributants to canine cutaneous mast cell tumour metastasis by global gene expression analysis
Source: PubMed Central journal article supplement (PMC6300220; doi:10.1371/journal.pone.0208026), 2018-12-19
Supplement: pone.0208026.s005.pdf [file pone.0208026.s005.pdf]

**S3 Table. Primary cutaneous mast cell tumour RNAs used for gene expression profiling.**

**A. Metastasising MCTs.**

| Dog ID.           | Age of FFPE tumour at RNA isolation (Years) | RNA integrity (SINE Cq) |
|-------------------|---------------------------------------------|-------------------------|
| CB7 <sup>a</sup>  | 2                                           | 21.91                   |
| CB1               | 5                                           | 22.46                   |
| CCR1              | 4                                           | 23.09                   |
| ESS1 <sup>a</sup> | 4                                           | 23.74                   |
| LR5               | 5                                           | 24.49                   |
| CB6               | 5                                           | 25.08                   |
| CB4               | 3                                           | 25.29                   |
| W1                | 4                                           | 25.44                   |
| B1                | 8                                           | 25.49                   |
| LR8               | 3                                           | 25.98                   |
| GS1               | 7                                           | 26.48                   |
| LR2               | 3                                           | 26.69                   |
| LR9               | 3                                           | 27.36                   |
| LR10              | 14                                          | 27.59                   |
| HV1               | 3                                           | 27.97                   |
| SBT1              | 3                                           | 27.99                   |
| LR3               | 4                                           | 28.87                   |
| GR1               | 2                                           | 29.18                   |
| D1                | 11                                          | 29.28                   |
| LR1               | 3                                           | 30.03                   |

<sup>a</sup>'Outlier RNA samples' excluded prior to differential gene expression analysis

Prior to 'outlier array' exclusion

|                             |             |              |
|-----------------------------|-------------|--------------|
| Mean and standard deviation | 4.80 ± 2.99 | 26.22 ± 2.28 |
| Median                      | 4.00        | 26.23        |
| Interquartile range         | 2.00        | 3.35         |

Following 'outlier array' exclusion

|                             |             |              |
|-----------------------------|-------------|--------------|
| Mean and standard deviation | 5.00 ± 3.07 | 26.60 ± 2.07 |
| Median                      | 4.00        | 26.59        |
| Interquartile range         | 2.50        | 2.97         |

## B. Non-metastasising MCTs.

| Dog ID.           | Age of FFPE tumour at RNA isolation (Years) | RNA integrity (SINE Cq) |
|-------------------|---------------------------------------------|-------------------------|
| LR6               | 4                                           | 21.88                   |
| CB3               | 9                                           | 23.46                   |
| MS2 <sup>a</sup>  | 7                                           | 24.27                   |
| W2                | 4                                           | 24.42                   |
| GR3               | 8                                           | 24.55                   |
| MS1               | 4                                           | 24.60                   |
| LR7               | 3                                           | 24.89                   |
| JRT1 <sup>a</sup> | 13                                          | 25.06                   |
| B3                | 5                                           | 25.54                   |
| CB2               | 10                                          | 26.03                   |
| B2                | 10                                          | 26.12                   |
| B4                | 13                                          | 26.39                   |
| CB5               | 7                                           | 26.76                   |
| SBT2              | 10                                          | 26.86                   |
| GR2               | 12                                          | 27.10                   |
| P1 <sup>a</sup>   | 10                                          | 27.11                   |
| LR11 <sup>a</sup> | 9                                           | 27.13                   |
| GR4               | 10                                          | 27.77                   |
| LR4               | 5                                           | 28.28                   |
| ETT1              | 11                                          | 29.63                   |

<sup>a</sup>'Outlier RNA samples' excluded prior to differential gene expression analysis

Prior to 'outlier array' exclusion

|                             |             |              |
|-----------------------------|-------------|--------------|
| Mean and standard deviation | 8.20 ± 3.08 | 25.89 ± 1.76 |
| Median                      | 9.00        | 26.07        |
| Interquartile range         | 5.00        | 2.54         |

Following 'outlier array' exclusion

|                             |             |              |
|-----------------------------|-------------|--------------|
| Mean and standard deviation | 7.81 ± 3.15 | 25.89 ± 1.86 |
| Median                      | 8.50        | 26.07        |
| Interquartile range         | 5.75        | 2.48         |
