# Supplementary material for: Identification of molecular genetic contributants to canine cutaneous mast cell tumour metastasis by global gene expression analysis
Source: PubMed Central journal article supplement (PMC6300220; doi:10.1371/journal.pone.0208026), 2018-12-19
Supplement: pone.0208026.s006.pdf [file pone.0208026.s006.pdf]

**S4 Table. RNA sample quality metrics for identification of 'outlier' arrays.**

|                   | all_probeset_mean | all_probeset_rle_mean | all_probeset_mad_residual_mean | pos_vs_neg_auc | %P                |
|-------------------|-------------------|-----------------------|--------------------------------|----------------|-------------------|
| GR1               | 0.05              | 0.16                  | 0.09                           | 0.23           | 0.38              |
| LR1               | 0.26              | 0.86                  | 0.72                           | 0.41           | 1.40              |
| LR2               | 0.08              | 0.09                  | 0.07                           | 0.08           | 0.94              |
| D1                | 0.02              | 0.06                  | 0.08                           | 0.03           | 0.60              |
| CB1               | 0.33              | 0.02                  | 0.12                           | 0.25           | 0.87              |
| LR3               | 0.14              | 0.22                  | 0.04                           | 0.00           | 0.89              |
| CCR1              | 0.24              | 0.08                  | 0.20                           | 0.31           | 0.82              |
| W1                | 0.16              | 0.74                  | 0.54                           | 0.25           | 0.17              |
| B1                | 0.27              | 0.53                  | 0.43                           | 0.50           | 1.72              |
| HV1               | 0.29              | 0.35                  | 0.31                           | 0.39           | 1.23              |
| CB7 <sup>a</sup>  | 0.63              | 0.29                  | 0.22                           | 0.31           | 5.88 <sup>b</sup> |
| B2                | 0.20              | 0.08                  | 0.12                           | 0.18           | 1.61              |
| JRT1 <sup>a</sup> | 0.37              | 0.07                  | 0.11                           | 0.24           | 2.92 <sup>b</sup> |
| CB2               | 0.25              | 0.30                  | 0.26                           | 0.39           | 1.61              |
| LR4               | 0.26              | 0.17                  | 0.21                           | 0.25           | 1.38              |
| ETT1              | 0.11              | 0.11                  | 0.08                           | 0.04           | 0.10              |
| LR11 <sup>a</sup> | 0.41              | 0.02                  | 0.13                           | 0.26           | 2.75 <sup>b</sup> |
| B3                | 0.19              | 0.02                  | 0.10                           | 0.22           | 1.50              |
| CB4               | 0.18              | 0.05                  | 0.04                           | 0.17           | 1.41              |
| ESS1 <sup>a</sup> | 0.30              | 0.23                  | 0.30                           | 0.28           | 2.55 <sup>b</sup> |
| LR9               | 0.19              | 0.13                  | 0.08                           | 0.35           | 1.80              |
| SBT1              | 0.15              | 0.05                  | 0.09                           | 0.20           | 0.47              |
| LR8               | 0.19              | 0.18                  | 0.17                           | 0.33           | 1.40              |
| LR5               | 0.03              | 0.35                  | 0.18                           | 0.03           | 0.43              |
| W2                | 0.13              | 0.28                  | 0.10                           | 0.04           | 0.91              |
| MS1               | 0.13              | 0.28                  | 0.22                           | 0.25           | 0.77              |
| LR6               | 0.07              | 0.30                  | 0.18                           | 0.21           | 0.02              |
| CB5               | 0.11              | 0.33                  | 0.13                           | 0.11           | 0.74              |
| LR7               | 0.12              | 0.23                  | 0.14                           | 0.10           | 1.47              |
| MS2 <sup>a</sup>  | 0.37              | 0.19                  | 0.31                           | 0.38           | 2.01 <sup>b</sup> |
| B4                | 0.18              | 0.32                  | 0.24                           | 0.41           | 1.81              |
| GR4               | 0.14              | 0.20                  | 0.02                           | 0.06           | 0.77              |
| P1 <sup>a</sup>   | 0.48              | 0.10                  | 0.21                           | 0.35           | 3.89 <sup>b</sup> |
| CB6               | 0.11              | 0.33                  | 0.14                           | 0.07           | 0.92              |
| LR10              | 0.21              | 0.00                  | 0.07                           | 0.05           | 0.31              |
| SBT2              | 0.03              | 0.27                  | 0.13                           | 0.11           | 0.83              |
| GS1               | 0.14              | 0.26                  | 0.18                           | 0.16           | 1.05              |
| CB3               | 0.08              | 0.50                  | 0.27                           | 0.01           | 0.80              |
| GR2               | 0.23              | 0.42                  | 0.28                           | 0.07           | 0.11              |
| GR3               | 0.25              | 0.24                  | 0.21                           | 0.23           | 0.87              |

<sup>a</sup>Outlier array and <sup>b</sup>associated RNA sample quality metric
